# Supplementary material for: Side-chain engineering of conjugated polymers toward highly efficient near-infrared organic photo-detectors via morphology and dark current management
Source: Royal Society of Chemistry journal article supplement (doi:10.1039/d0tc00082e), 2020-01-01
Supplement: d0tc00082e1.pdf [file d0tc00082e1.pdf]

## Supporting Information

### Side Chain Engineering of Conjugated Polymers toward Highly Efficient Near-Infrared Organic Photo-Detector via Morphology and Dark Current Management

Yeongkwon Kang, Hyeong Ju Eun, Hyojin Kye, Dahee Kim, Junseok Heo, Jong H. Kim,\* and Bong-Gi Kim\*

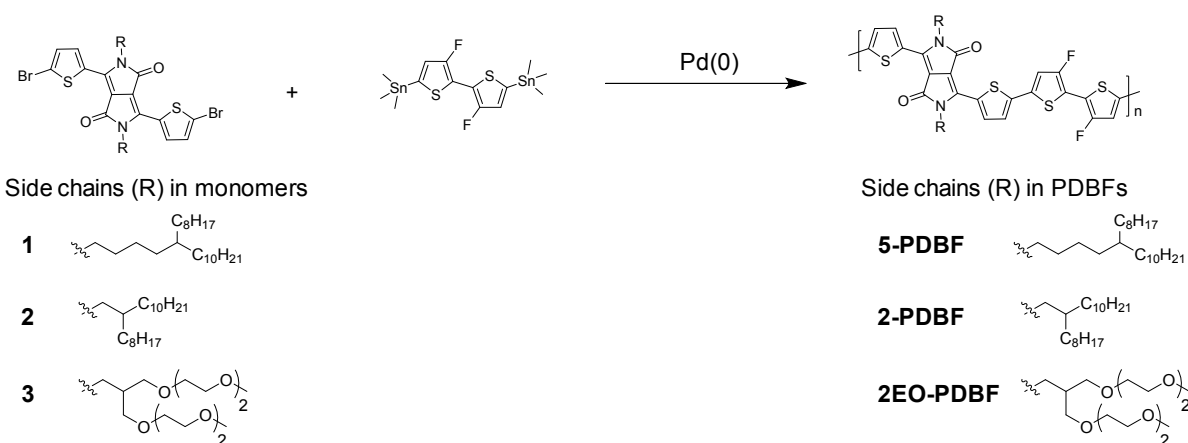

**Scheme S1** Detailed chemical structures and synthetic routes of the designed conjugated polymers.

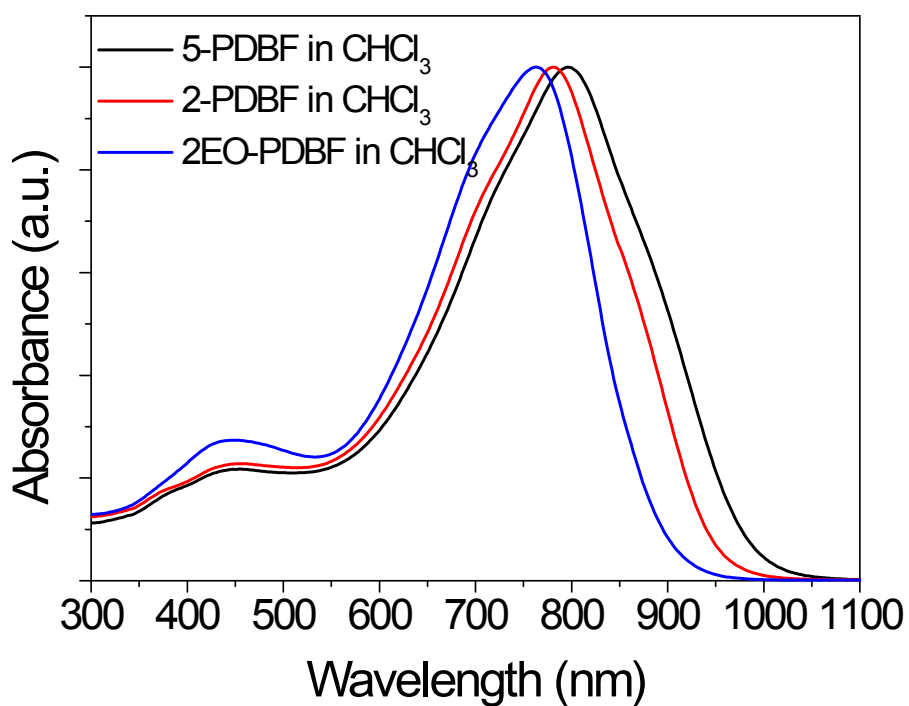

Fig. S1 UV-visible absorption of obtained conjugated polymers in chloroform solution.

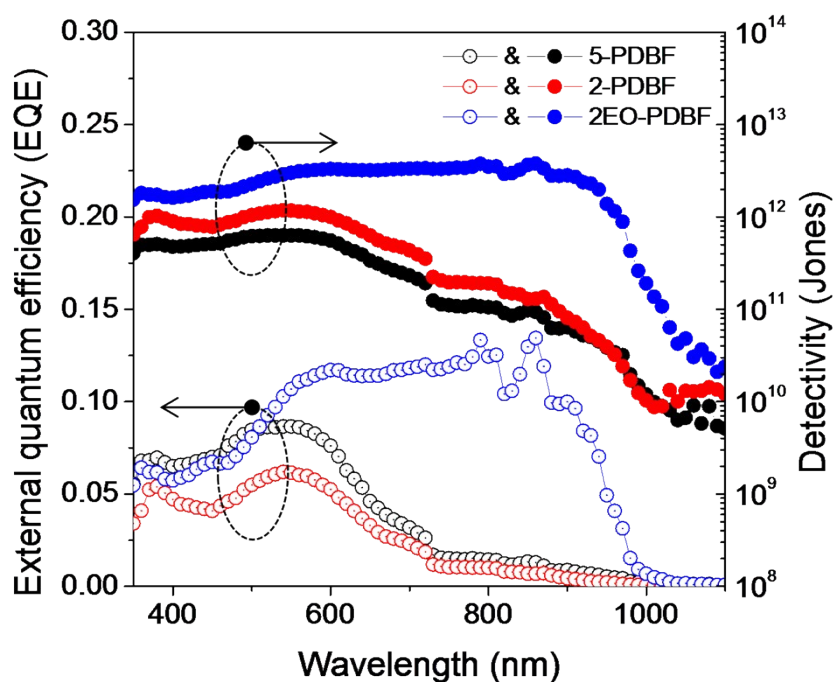

Fig. S2 External quantum efficiency and corresponding detectivity of each CP:PC<sub>71</sub>BM blend films; (a) 5-PDBF:PC<sub>71</sub>BM, (b) 2-PDBF:PC<sub>71</sub>BM, and (c) 2EO-PDBF:PC<sub>71</sub>BM.

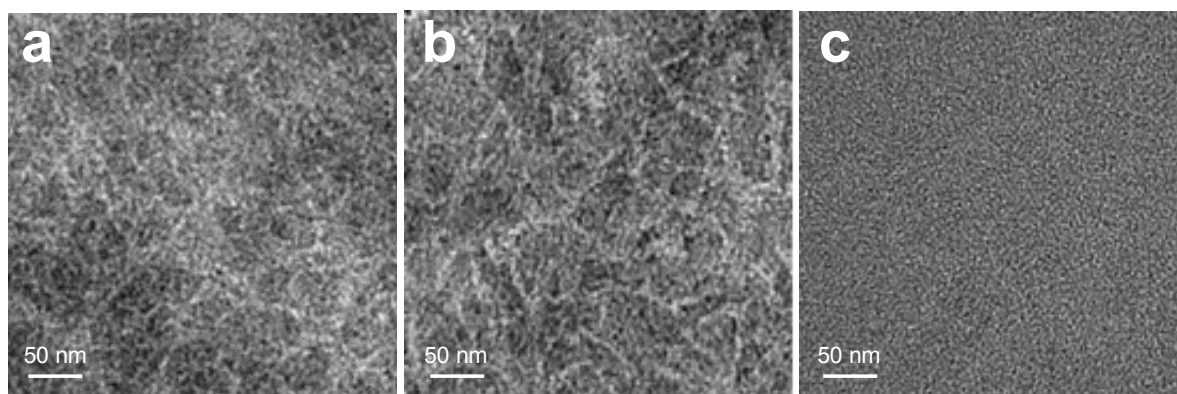

**Fig. S3** TEM images of each CP:PC<sub>71</sub>BM blend films; (a) **5-PDBF**:PC<sub>71</sub>BM, (b) **2-PDBF**:PC<sub>71</sub>BM, and (c) **2EO-PDBF**:PC<sub>71</sub>BM.

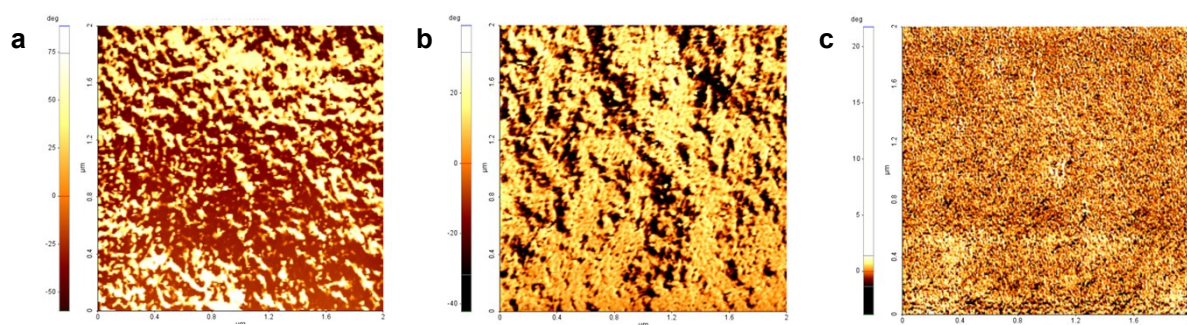

**Fig. S4** Phase mode AFM images of each CP:PC<sub>71</sub>BM blend films; (a) **5-PDBF**:PC<sub>71</sub>BM, (b) **2-PDBF**:PC<sub>71</sub>BM, and (c) **2EO-PDBF**:PC<sub>71</sub>BM.

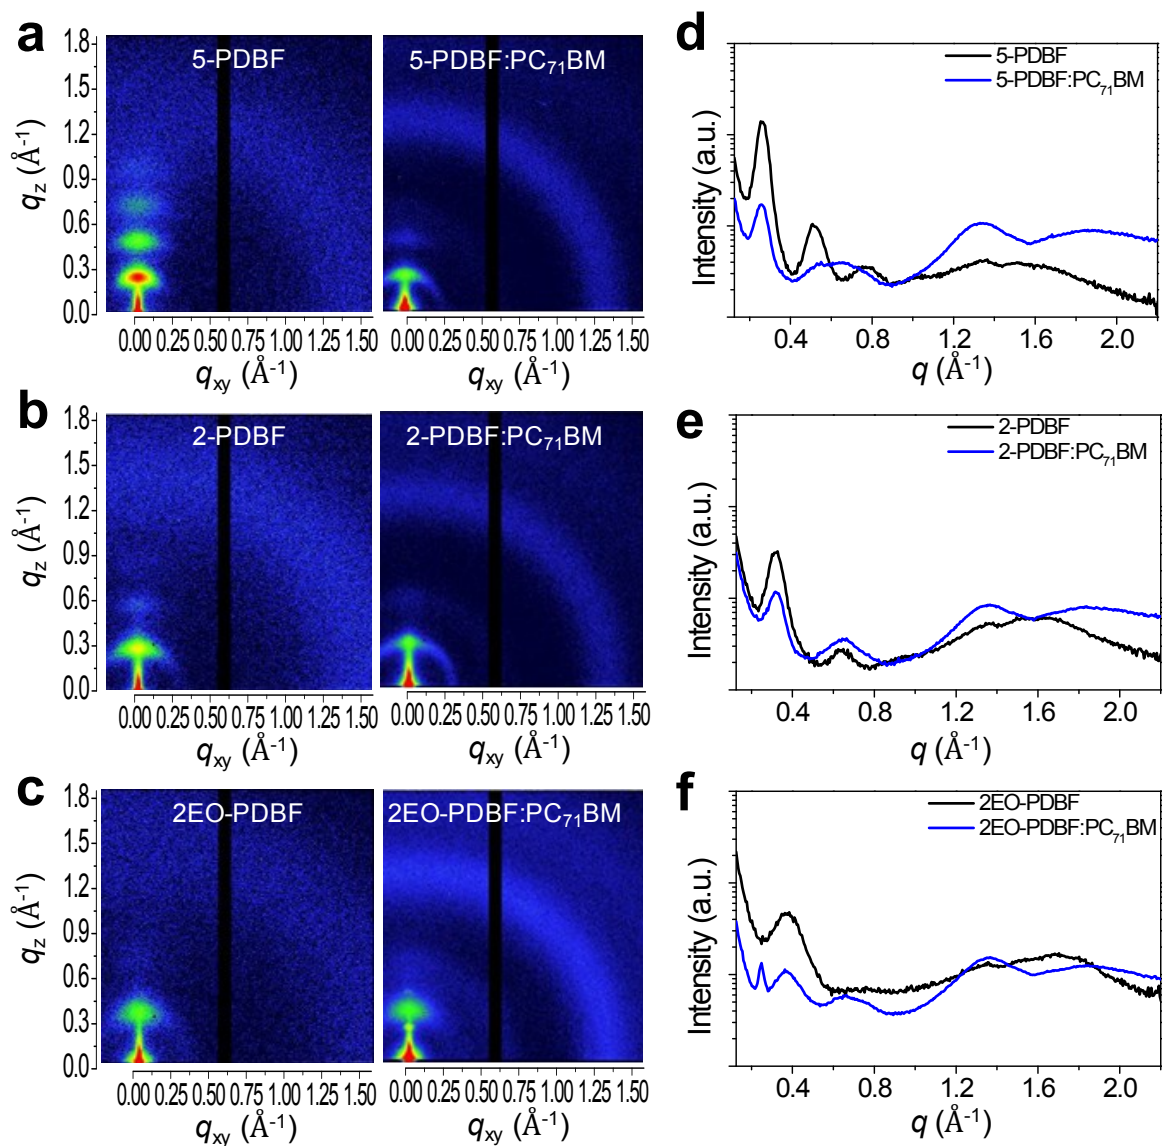

**Fig. S5** 2D GIXRD of each CP and corresponding PC<sub>71</sub>BM blend films; (a-c) 2D diffraction images and (d-f) integrated diffraction tendency of **5-PDBF**, **2-PDBF**, and **2EO-PDBF**.

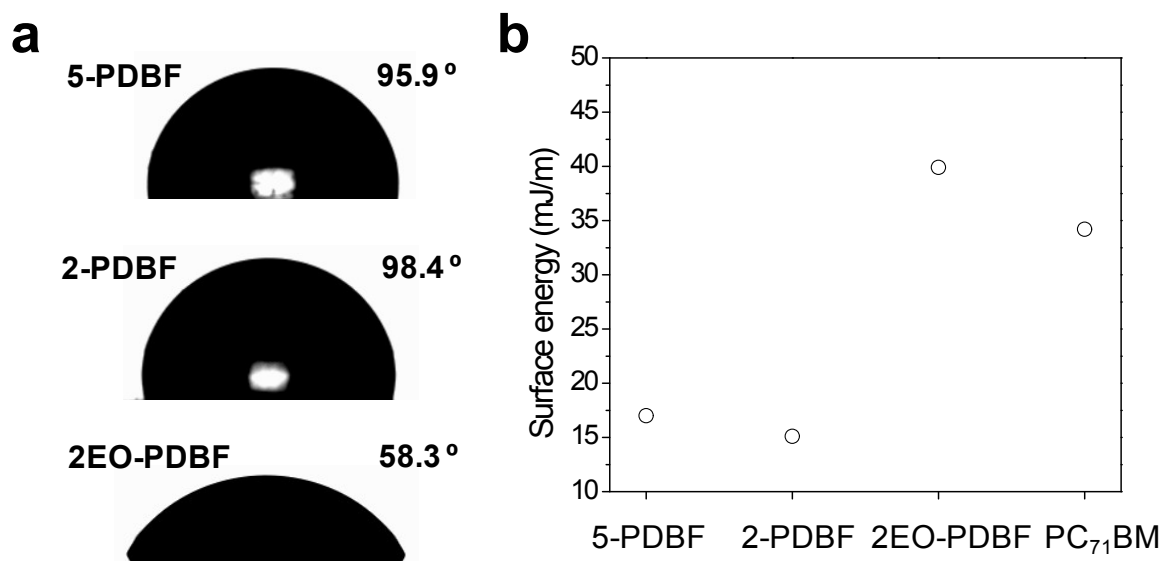

**Fig. S6** (a) Contact angle measured with ethylene glycol droplet, and (b) calculated surface energy of obtained conjugated polymers.

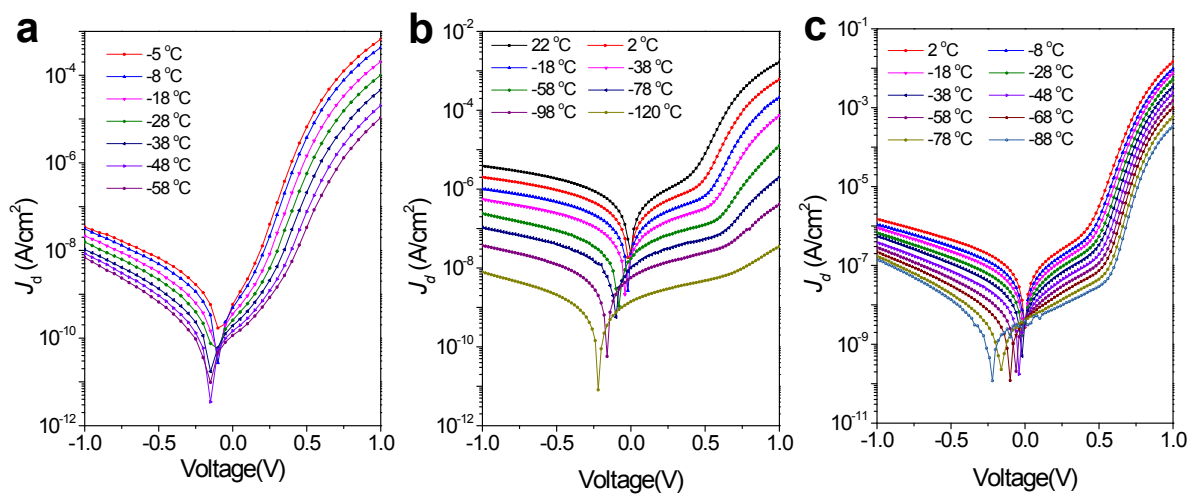

**Fig. S7** Temperature-dependent dark current of each OPDs. (a) 5-PDBF:PC<sub>71</sub>BM, (b) 2-PDBF:PC<sub>71</sub>BM, and (c) 2EO-PDBF:PC<sub>71</sub>BM
